# Supplementary material for: Inhibition of Adherence and Biofilm Formation of Pseudomonas aeruginosa by Immobilized ZnO Nanoparticles on Silicone Urinary Catheter Grafted by Gamma Irradiation
Source: MDPI journal article supplement (doi:10.3390/microorganisms11040913), 2023-03-31
Supplement: s1 [file s1]

**Table S1:** Preliminary identification of microbial isolates and their biofilm forming ability

| Isolate number | Categorization of Isolates Based on Culturing and Gram Staining <sup>1</sup> | Biofilm Formation (Average Optical Density at 630 nm) <sup>2,3</sup> | Classification of Biofilm Production <sup>4</sup> |
|----------------|------------------------------------------------------------------------------|----------------------------------------------------------------------|---------------------------------------------------|
| 1              | G-ve LF                                                                      | 0.346                                                                | ++                                                |
| 2              | G-ve LF                                                                      | 0.170                                                                | +                                                 |
| 3              | G-ve NLF                                                                     | 0.155                                                                | 0                                                 |
| 4              | G-ve LF                                                                      | 0.291                                                                | +                                                 |
| 5              | G-ve NLF                                                                     | 0.203                                                                | +                                                 |
| <b>6*</b>      | <b>yeast</b>                                                                 | <b>0.870</b>                                                         | <b>+++</b>                                        |
| 7              | yeast                                                                        | 0.490                                                                | ++                                                |
| <b>8*</b>      | <b>G-ve LF</b>                                                               | <b>0.953</b>                                                         | <b>+++</b>                                        |
| 9              | yeast                                                                        | 0.432                                                                | ++                                                |
| 10             | yeast                                                                        | 0.501                                                                | ++                                                |
| 11             | G-ve LF                                                                      | 0.568                                                                | ++                                                |
| 12             | G-ve LF                                                                      | 0.209                                                                | +                                                 |
| 13             | G-ve LF                                                                      | 0.153                                                                | 0                                                 |
| 14             | G-ve NLF                                                                     | 0.175                                                                | +                                                 |
| 15             | yeast                                                                        | 0.214                                                                | +                                                 |
| 16             | yeast                                                                        | 0.370                                                                | ++                                                |
| 17             | G-ve LF                                                                      | 0.180                                                                | +                                                 |
| 18             | G-ve LF                                                                      | 0.350                                                                | ++                                                |
| 19             | G+ve cocci                                                                   | 0.439                                                                | ++                                                |
| 20             | yeast                                                                        | 0.321                                                                | ++                                                |
| 21             | G-ve LF                                                                      | 0.388                                                                | ++                                                |
| 22             | G-ve LF                                                                      | 0.135                                                                | 0                                                 |
| 23             | G-ve NLF                                                                     | 0.470                                                                | ++                                                |
| 24             | G-ve NLF                                                                     | 0.599                                                                | ++                                                |
| 25             | G-ve LF                                                                      | 0.165                                                                | +                                                 |
| <b>26*</b>     | <b>G-ve NLF</b>                                                              | <b>0.947</b>                                                         | <b>+++</b>                                        |
| 27             | yeast                                                                        | 0.468                                                                | ++                                                |
| 28             | yeast                                                                        | 0.193                                                                | +                                                 |
| 29             | G-ve LF                                                                      | 0.229                                                                | +                                                 |
| 30             | yeast                                                                        | 0.395                                                                | ++                                                |
| 31             | G-ve LF                                                                      | 0.131                                                                | 0                                                 |
| 32             | G-ve LF                                                                      | 0.270                                                                | +                                                 |
| 33             | G-ve LF                                                                      | 0.098                                                                | 0                                                 |
| 34             | G+ve cocci                                                                   | 0.114                                                                | 0                                                 |
| <b>35*</b>     | <b>G+ve cocci</b>                                                            | <b>0.751</b>                                                         | <b>+++</b>                                        |
| <b>36*</b>     | <b>G-ve LF</b>                                                               | <b>0.702</b>                                                         | <b>+++</b>                                        |
| 37             | yeast                                                                        | 0.207                                                                | +                                                 |

<sup>1</sup> culturing on nutrient agar, MacConkey no. 3 and Sabaroud agar followed by Gram staining, G+ve: Gram-positive, G-ve: Gram-negative, LF: lactose fermenters, NLF: non-lactose fermenters. <sup>2</sup>Average Blank = 0.125;

<sup>3</sup>Optical density cut-off value (ODc) = 0.158; <sup>4</sup> 0: non-biofilm forming, +: weak, ++: moderate, and +++: strong-biofilm producing. \*selected strong-biofilm producing isolated.

Table S1: continued

| Isolate number | Categorization of Isolates Based on Culturing and Gram Staining <sup>1</sup> | Biofilm Formation (Average Optical Density at 630 nm) <sup>2,3</sup> | Classification of Biofilm Production <sup>4</sup> |
|----------------|------------------------------------------------------------------------------|----------------------------------------------------------------------|---------------------------------------------------|
| 38             | G-ve LF                                                                      | 0.406                                                                | ++                                                |
| 39             | G-ve LF                                                                      | 0.356                                                                | ++                                                |
| <b>40*</b>     | <b>G-ve NLF</b>                                                              | <b>0.884</b>                                                         | <b>+++</b>                                        |
| 41             | yeast                                                                        | 0.191                                                                | +                                                 |
| 42             | G+ve cocci                                                                   | 0.350                                                                | ++                                                |
| 43             | G-ve LF                                                                      | 0.145                                                                | 0                                                 |
| 44             | G-ve LF                                                                      | 0.197                                                                | +                                                 |
| 45             | yeast                                                                        | 0.489                                                                | ++                                                |
| 46             | G-ve LF                                                                      | 0.149                                                                | 0                                                 |
| 47             | G-ve LF                                                                      | 0.244                                                                | +                                                 |
| 48             | G+ve cocci                                                                   | 0.319                                                                | ++                                                |
| <b>49*</b>     | <b>G-ve LF</b>                                                               | <b>0.869</b>                                                         | <b>+++</b>                                        |
| 50             | G+ve cocci                                                                   | 0.380                                                                | ++                                                |
| 51             | G-ve LF                                                                      | 0.310                                                                | +                                                 |
| 52             | G-ve NLF                                                                     | 0.159                                                                | +                                                 |
| 53             | yeast                                                                        | 0.174                                                                | +                                                 |
| 54             | G-ve LF                                                                      | 0.138                                                                | 0                                                 |
| <b>55*</b>     | <b>G-ve LF</b>                                                               | <b>0.859</b>                                                         | <b>+++</b>                                        |
| <b>56*</b>     | <b>G-ve NLF</b>                                                              | <b>0.801</b>                                                         | <b>+++</b>                                        |
| 57             | yeast                                                                        | 0.405                                                                | ++                                                |
| 58             | yeast                                                                        | 0.233                                                                | +                                                 |
| 59             | G+ve cocci                                                                   | 0.490                                                                | ++                                                |
| 60             | G+ve cocci                                                                   | 0.260                                                                | +                                                 |
| <b>61*</b>     | <b>G-ve NLF</b>                                                              | <b>1.069</b>                                                         | <b>+++</b>                                        |
| 62             | G-ve LF                                                                      | 0.350                                                                | ++                                                |
| 63             | G-ve LF                                                                      | 0.449                                                                | ++                                                |
| 64             | G-ve NLF                                                                     | 0.576                                                                | ++                                                |
| 65             | yeast                                                                        | 0.346                                                                | ++                                                |
| 66             | G-ve NLF                                                                     | 0.190                                                                | +                                                 |
| 67             | G+ve cocci                                                                   | 0.400                                                                | ++                                                |
| 68             | G-ve LF                                                                      | 0.317                                                                | ++                                                |
| 69             | G-ve NLF                                                                     | 0.163                                                                | +                                                 |
| 70             | G-ve NLF                                                                     | 0.360                                                                | ++                                                |
| 71             | yeast                                                                        | 0.178                                                                | +                                                 |
| 72             | G-ve LF                                                                      | 0.174                                                                | +                                                 |
| 73             | G-ve LF                                                                      | 0.12                                                                 | 0                                                 |
| 74             | G+ve cocci                                                                   | 0.37                                                                 | ++                                                |

<sup>1</sup> culturing on nutrient agar, MacConkey no. 3 and Sabaroud agar followed by Gram staining, G+ve: Gram-positive, G-ve: Gram-negative, LF: lactose fermenters, NLF: non-lactose fermenters. <sup>2</sup>Average Blank = 0.125;

<sup>3</sup>Optical density cut-off value (ODc) = 0.158; <sup>4</sup> 0: non-biofilm forming, +: weak, ++: moderate, and +++: strong-biofilm producing. \*selected strong-biofilm producing isolated.

**Table S2.** Summary of the classification of microbial isolates recovered from urinary silicone catheters according to their growth on culture media, Gram-staining reaction, and degree of biofilm formation

| Microbe               | Biofilm production |                  |              |             |       |
|-----------------------|--------------------|------------------|--------------|-------------|-------|
|                       | Strong biofilm     | Moderate biofilm | Weak biofilm | Non-biofilm | Total |
| Gram Negative Bacilli | 8                  | 13               | 16           | 9           | 46    |
| Gram Positive Cocci   | 1                  | 7                | 1            | 1           | 10    |
| Yeast                 | 1                  | 10               | 7            | 0           | 18    |
| Total                 | 10                 | 30               | 24           | 10          | 74    |

**Table S3:** Biochemical Identification of Selected Strong-biofilm forming Clinical Isolates using VITEK 2 Compact system

| Type                  | Microbial Type         | Isolate Number | Strain Identification by Vitek2 compact | Bionumber        |
|-----------------------|------------------------|----------------|-----------------------------------------|------------------|
| Gram-negative bacilli | Lactose Fermenters     | 8              | <i>Klebsiella pneumoniae</i>            | 6607730773565010 |
|                       |                        | 49             |                                         | 6607734753564010 |
|                       |                        | 55             |                                         | 6667735753765011 |
|                       | Non-Lactose Fermenters | 36             | <i>Escherichia coli</i>                 | 0405610554566211 |
|                       |                        | 26             | <i>Pseudomonas aeruginosa</i>           | 0003043003500252 |
|                       |                        | 40             |                                         | 0003453143500210 |
|                       |                        | 61             |                                         | 0003453143500210 |
|                       |                        | 56             | <i>Alcaligenes faecalis</i>             | 0000001103500042 |
| Gram-positive cocci   | cocci                  | 35             | <i>Staphylococcus aureus</i>            | 3063153303520050 |
| Fungal isolates       | yeast                  | 6              | <i>Candida tropicalis</i>               | 6627734553566010 |

**Table S4:** Antimicrobial Susceptibility Testing of Gram negative Strong-biofilm forming Clinical Isolates and their Interpretation<sup>1</sup>

| Clinical Isolate<br>Antibiotic tested | <i>E. coli</i>        | <i>A. faecalis</i>  | <i>K. pneumonia</i> |                     |              | <i>P. aeruginosa</i> |               |               |
|---------------------------------------|-----------------------|---------------------|---------------------|---------------------|--------------|----------------------|---------------|---------------|
|                                       | Isolate<br>36         | Isolate<br>56       | Isolate<br>55       | Isolate<br>49       | Isolate<br>8 | Isolate<br>26        | Isolate<br>40 | Isolate<br>61 |
| <b><i>Beta-lactams</i></b>            |                       |                     |                     |                     |              |                      |               |               |
| Ampicillin                            | ≥ 32 / R <sup>2</sup> | -                   | ≥ 32 / R            | ≥ 32 / R            | ≥ 32 / R     | -                    | -             | -             |
| Ampicillin/Sulbactam                  | ≥ 32 / R              | -                   | ≥ 32 / R            | ≥ 32 / R            | ≥ 32 / R     | -                    | -             | -             |
| Piperacillin/Tazobactam               | ≥ 128 / R             | ≥ 128 / R           | ≥ 128 / R           | 16 / S <sup>3</sup> | 16 / S       | ≥ 128 / R            | ≥ 128 / R     | ≥ 128 / R     |
| Cefazolin                             | ≥ 64 / R              | 16 / I <sup>4</sup> | ≥ 64 / R            | ≥ 64 / R            | ≥ 64 / R     | ≥ 64 / R             | ≥ 64 / R      | ≥ 64 / R      |
| Cefoxitin                             | ≥ 64 / R              | -                   | ≥ 64 / R            | ≥ 64 / R            | ≥ 64 / R     |                      | -             | -             |
| Ceftazidime                           | 32 / R                | 4 / S               | ≥ 64 / R            | 8 / I               | 8 / I        | ≥ 64 / R             | 32 / R        | 32 / R        |
| Ceftriaxone                           | ≥ 64 / R              | ≤ 1 / S             | ≥ 64 / R            | ≤ 1 / S             | ≤ 1 / S      | -                    | -             | -             |
| Cefepime                              | ≥ 64 / R              | 8 / S               | ≥ 64 / R            | ≤ 1 / S             | ≤ 1 / S      | ≥ 64 / R             | ≥ 64 / R      | ≥ 64 / R      |
| Meropenem                             | ≤ 0.25 / S            | ≤ 0.25 / S          | ≤ 0.25 / S          | ≤ 0.25 / S          | ≤ 0.25 / S   | ≤ 0.25 / S           | ≤ 0.25 / S    | ≤ 0.25 / S    |
| ESBL                                  | NEG                   | -                   | NEG                 | NEG                 | NEG          | -                    | -             | -             |
| <b><i>Aminoglycoside</i></b>          |                       |                     |                     |                     |              |                      |               |               |
| Amikacin                              | ≤ 2 / S               | 4 / S               | 4 / S               | ≤ 2 / S             | ≤ 2 / S      | 4 / S                | ≤ 2 / S       | ≤ 2 / S       |
| Gentamicin                            | ≤ 1 / S               | 2 / S               | ≥ 16 / R            | ≤ 1 / S             | ≤ 1 / S      | ≥ 16 / R             | ≤ 1 / S       | ≤ 1 / S       |
| Tobramycin                            | ≤ 1 / S               | 2 / S               | ≥ 16 / R            | ≤ 1 / S             | ≤ 1 / S      | ≥ 16 / R             | ≤ 1 / S       | ≤ 1 / S       |
| <b><i>Quinolones</i></b>              |                       |                     |                     |                     |              |                      |               |               |
| Ciprofloxacin                         | ≤ 0.25 / S            | 1 / S               | ≥ 4 / R             | 0.5 / S             | 0.5 / S      | ≥ 4 / R              | ≤ 0.25 / S    | ≤ 0.25 / S    |
| Levofloxacin                          | 1 / S                 | 1 / S               | ≥ 8 / R             | 1 / S               | 1 / S        | ≥ 8 / R              | 1 / S         | 1 / S         |
| Nitrofurantoin                        | ≥ 512 / R             | -                   | ≤ 16 / S            | 64 / I              | 64 / I       | -                    | -             | -             |
| <b><i>Folate inhibitors</i></b>       |                       |                     |                     |                     |              |                      |               |               |
| Trimethoprim/Sulfamethoxazole         | ≥ 320 / R             | ≤ 20 / S            | ≥ 320 / R           | ≤ 20 / S            | ≤ 20 / S     | -                    | -             | -             |

<sup>1</sup> interpretation according to Performance Standards for Antimicrobial Susceptibility Testing, 32nd ed. CLSI supplement M100. Clinical and Laboratory Standards Institute; 2022.<sup>2</sup> R: resistant, <sup>3</sup>S: sensitive, <sup>4</sup>I: intermediate.

**Table S5:** Antimicrobial Susceptibility Testing of Gram positive Strong-biofilm forming Clinical Isolate and its Interpretation<sup>1</sup>

| Antibiotics tested               | Staphylococcus aureus (Isolate 35) |                |
|----------------------------------|------------------------------------|----------------|
|                                  | MIC µg/mL                          | Interpretation |
| Beta-lactams                     |                                    |                |
| Benzylpenicillin                 | ≤ 0.03                             | S              |
| Oxacillin                        | 1                                  | S              |
| Cefoxitin Screen                 | Positive                           |                |
| Aminoglycoside                   |                                    |                |
| Gentamicin                       | ≤ 0.5                              | S              |
| Quinolones                       |                                    |                |
| Ciprofloxacin                    | ≤ 0.5                              | S              |
| Levofloxacin                     | 0.25                               | S              |
| Moxifloxacin                     | ≤ 0.25                             | S              |
| Macrolides                       |                                    |                |
| Erythromycin                     | 0.5                                | S              |
| Clindamycin                      | ≤ 0.25                             | S              |
| Inducible Clindamycin Resistance | Negative                           |                |
| Streptogramin                    |                                    |                |
| Quinupristin/Dalfopristin        | 0.5                                | S              |
| Oxazolidinones                   |                                    |                |
| Linezolid                        | 4                                  | S              |
| Glycopeptide                     |                                    |                |
| Vancomycin                       | 1                                  | S              |
| Tetracycline                     |                                    |                |
| Tetracycline                     | ≤ 1                                | S              |
| Glycylcycline                    |                                    |                |
| Tigecycline                      | ≤ 0.12                             | S              |
| Others                           |                                    |                |
| Nitrofurantoin                   | ≤ 16                               | S              |
| Antimycobacterials               |                                    |                |
| Rifampicin                       | ≤ 0.5                              | S              |
| Folate inhibitors                |                                    |                |
| Trimethoprim/Sulfamethoxazole    | ≤ 10                               | S              |

<sup>1</sup> interpretation according to Performance Standards for Antimicrobial Susceptibility Testing. 32nd ed. CLSI supplement M100. Clinical and Laboratory Standards Institute; 2022.

**Table S6.** Summary of the classification of the strong biofilm forming isolates according to the interim standard definitions for acquired resistance

| Strong Biofilm-producing clinical isolates Classification of Antibiotics Susceptibility |      |                  |
|-----------------------------------------------------------------------------------------|------|------------------|
| <i>Klebsiella pneumoniae</i>                                                            | #08  | S <sup>1</sup>   |
|                                                                                         | #49  | S                |
|                                                                                         | #55* | MDR <sup>2</sup> |
| <i>Pseudomonas aeruginosa</i>                                                           | #61  | S                |
|                                                                                         | #40  | S                |
|                                                                                         | #26* | XDR <sup>3</sup> |
| <i>Alcaligenes faecalis</i>                                                             | #56* | S                |
| <i>Escherichia coli</i>                                                                 | #36* | MDR              |
| <i>Staphylococcus aureus</i>                                                            | #35* | S                |

\* Molecularly identified isolates, <sup>1</sup> S: susceptible, <sup>2</sup> Multidrug-resistant, <sup>3</sup> extensively drug-resistant.

**Table S7.** Effect of ZnO NPs at subMICs concentrations on growth and biofilm formation by selected isolates

| Microbe              | ZnO NPs (mg/mL) |               |               |               |               |               |                     |
|----------------------|-----------------|---------------|---------------|---------------|---------------|---------------|---------------------|
|                      | Control         | 0.062         | 0.125         | 0.25          | 0.5           | 1             |                     |
| <i>P. aeruginosa</i> | +               | +             | +             | +             | +             | +             | Growth <sup>1</sup> |
|                      | 0.947 ± 0.1     | 0.306 ± 0.091 | 0.257 ± 0.095 | 0.189 ± 0.007 | 0.171 ± 0.041 | 0.165 ± 0.067 | OD630               |
| <i>K. pneumoniae</i> | +               | +             | +             | +             | +             | +             | Growth              |
|                      | 0.859 ± 0.1     | 0.225 ± 0.009 | 0.352 ± 0.026 | 0.448 ± 0.007 | 0.488 ± 0.117 | 0.478 ± 0.120 | OD630               |
| <i>E. coli</i>       | +               | +             | +             | +             | -             | -             | Growth              |
|                      | 0.702 ± 0.1     | 0.104 ± 0.004 | 0.112 ± 0.004 | 0.109 ± 0.006 | 0.109 ± 0.011 | 0.111 ± 0.003 | OD630               |
| <i>A. faecalis</i>   | +               | +             | +             | +             | +             | -             | Growth              |
|                      | 0.801 ± 0.1     | 0.306 ± 0.043 | 0.350 ± 0.084 | 0.218 ± 0.089 | 0.262 ± 0.091 | 0.198 ± 0.068 | OD630               |
| <i>S. aureus</i>     | +               | +             | +             | -             | -             | -             | Growth              |
|                      | 0.751 ± 0.1     | 0.760 ± 0.115 | 0.406 ± 0.194 | 0.259 ± 0.131 | 0.163 ± 0.004 | 0.291 ± 0.079 | OD630               |
| <i>C. tropicalis</i> | +               | +             | +             | +             | +             | +             | Growth              |
|                      | 0.870 ± 0.1     | 0.259 ± 0.016 | 0.251 ± 0.016 | 0.177 ± 0.053 | 0.149 ± 0.031 | 0.142 ± 0.026 | OD630               |

1: growth either as + = growth or - = no growth observed

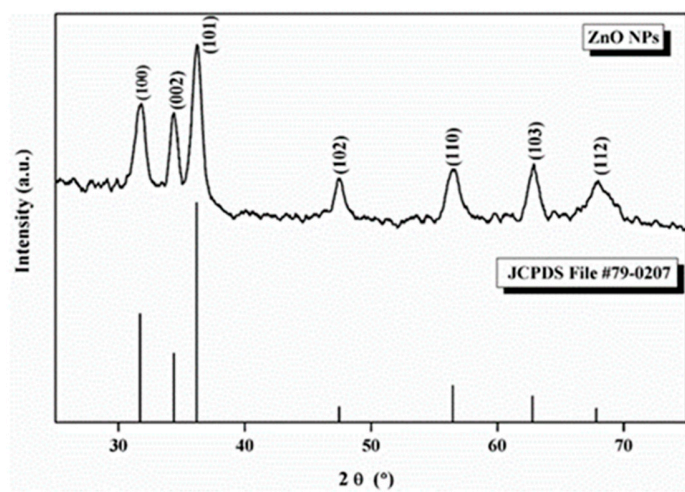

Figure S1. X-ray Diffraction Analysis patterns of the synthesized ZnO NPs relative to the standard ZnO NPs

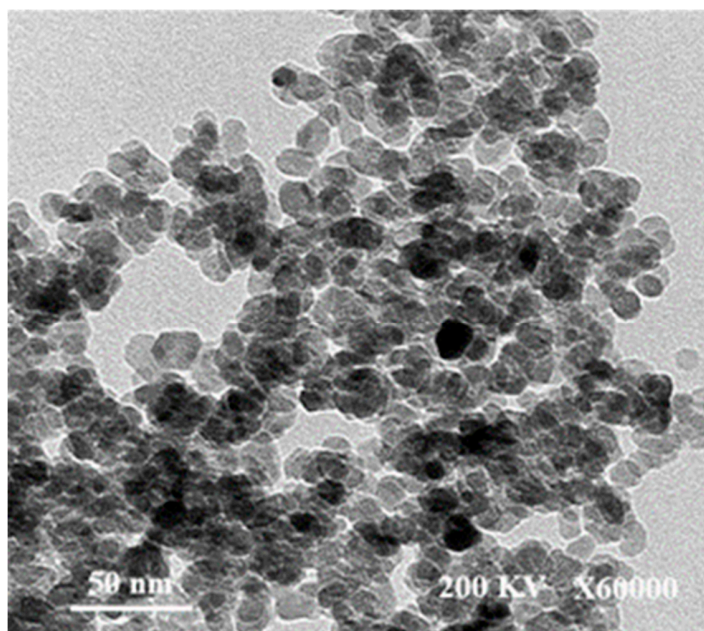

Figure S2. Transmission Electron Microscopy Image of the synthesized ZnO NPs

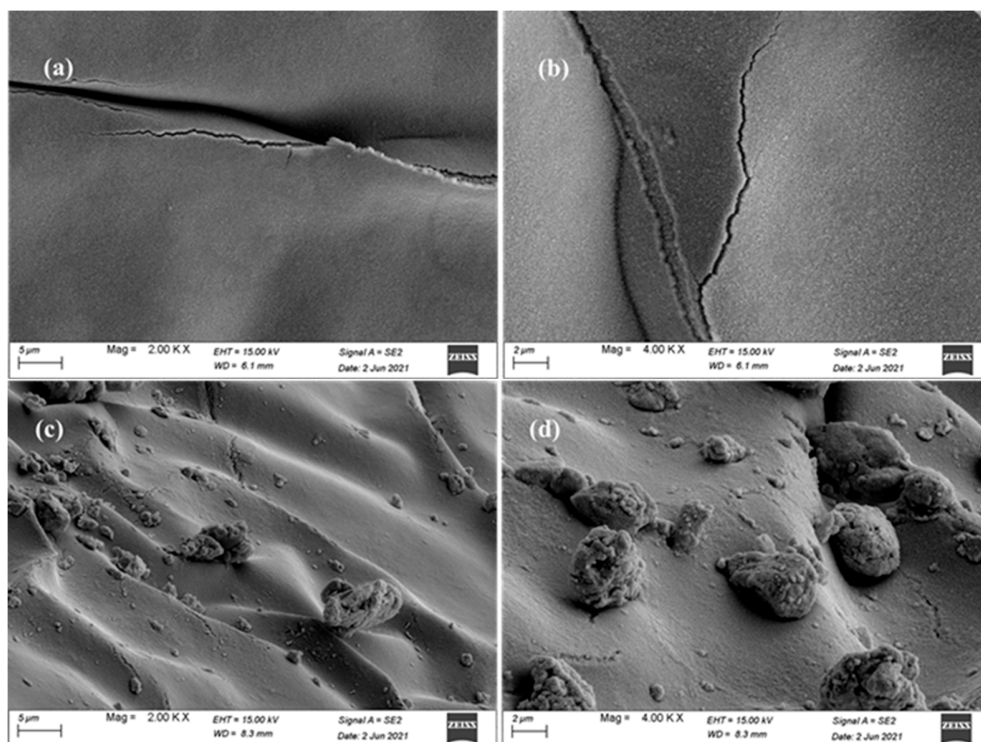

**Figure S3.** Scanning electron microscopy (SEM) microphotograph of SR and SR-g-AAc. (a) SR at 2.00 KX and (b) SR at 4.00 KX, SR-g-AAc at (c) 2.00 KX and (d) 4.00 KX.
